# Supplementary material for: Machine-learning-assisted material discovery of oxygen-rich highly porous carbon active materials for aqueous supercapacitors
Source: Springer Nature journal article supplement (doi:10.1038/s41467-023-40282-1), 2023-08-01
Supplement: 41467_2023_40282_MOESM1_ESM.pdf [file 41467_2023_40282_MOESM1_ESM.pdf]

# Machine-Learning-Assisted Material Discovery of Oxygen-Rich Highly Porous Carbon Active Materials for Aqueous Supercapacitors

Tao Wang,<sup>1,2</sup> Runtong Pan,<sup>3</sup> Murillo L. Martins,<sup>4</sup> Jinlei Cui,<sup>5</sup> Zhennan Huang,<sup>6</sup> Bishnu P. Thapaliya,<sup>1,2</sup> Chi-Linh Do-Thanh,<sup>2</sup> Musen Zhou,<sup>3</sup> Juntian Fan,<sup>2</sup> Zhenzhen Yang,<sup>1,2</sup> Miaofang Chi,<sup>6</sup> Takeshi Kobayashi,<sup>5</sup> Jianzhong Wu,<sup>3</sup> Eugene Mamontov,<sup>4</sup> Sheng Dai<sup>1,2\*</sup>

<sup>1</sup> *Chemical Sciences Division, Oak Ridge National Laboratory, Oak Ridge, TN 37831, USA*

<sup>2</sup> *Department of Chemistry, Institute for Advanced Materials and Manufacturing, University of Tennessee, Knoxville, Tennessee 37996, USA*

<sup>3</sup> *Department of Chemical and Environmental Engineering, University of California, Riverside, Riverside, California 92521, USA*

<sup>4</sup> *Neutron Scattering Division, Oak Ridge National Laboratory, Oak Ridge, Tennessee 37831, USA*

<sup>5</sup> *U.S. DOE Ames Laboratory, Ames, Iowa 50011, USA*

<sup>6</sup> *Center for Nanophase Materials Sciences, Oak Ridge National Laboratory. Oak Ridge, Tennessee 37831, USA*

\* *Email: dais@ornl.gov*

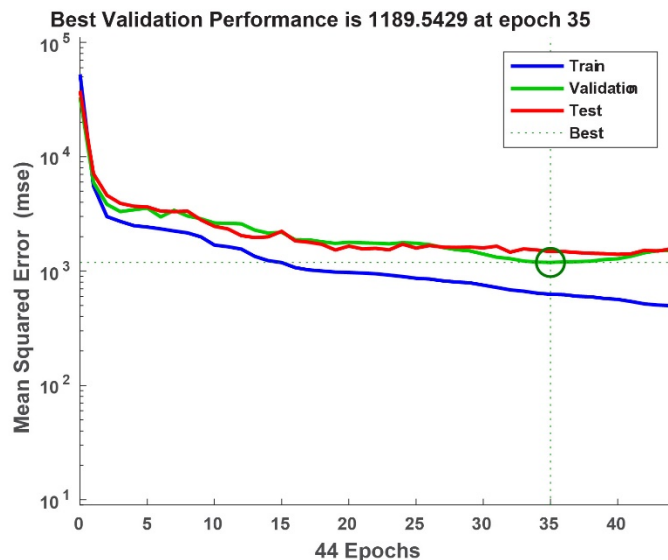

**Supplementary Figure 1** | The learning curves of the ANN model without the experimental data.

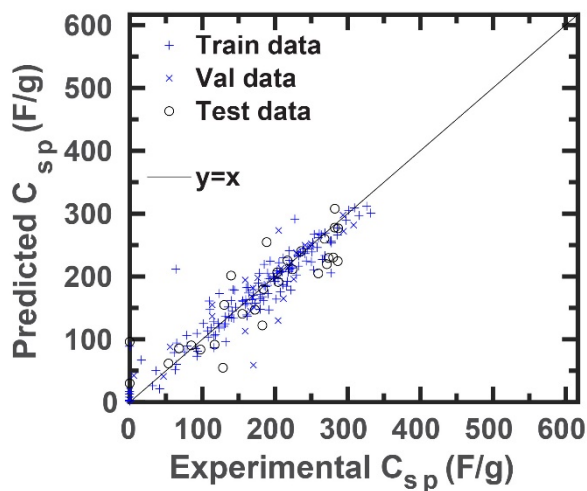

**Supplementary Figure 2** | Correlated capacitance vs experimental capacitance for the ANN model based on the data plots from the literature. Train RMSE=25.0, Val RMSE=34.5, Test RMSE=38.5.  $C_{sp}$  means “specific capacitance”.

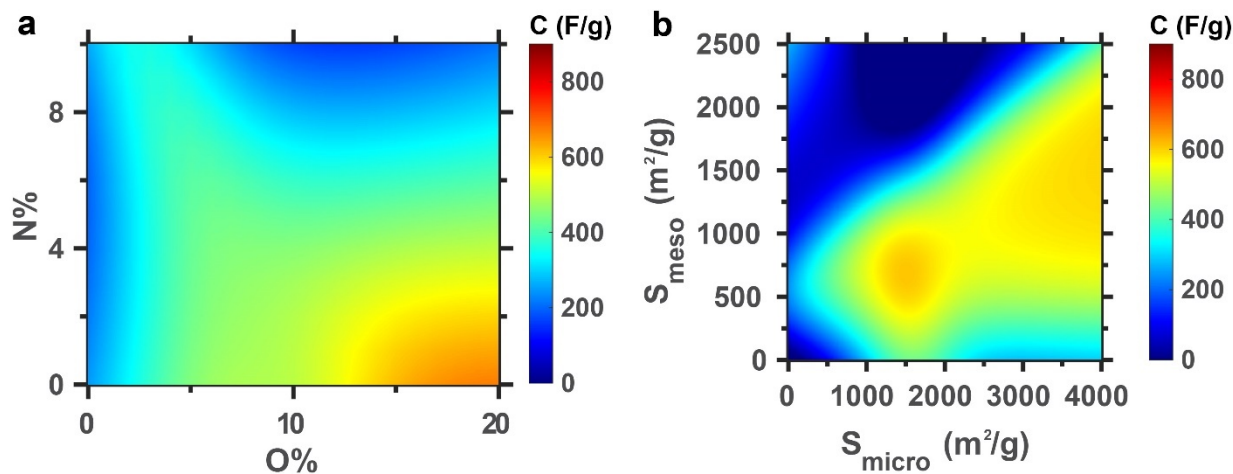

**Supplementary Figure 3** | a, Specific capacitance vs O/N content for carbon materials with  $S_{micro}=1502 m^2/g$ ,  $S_{meso}=687 m^2/g$  at 5 mV/s. b, Capacitance vs the surface areas of micropores and mesopores when doped with 0.5% nitrogen and 20% oxygen at 5 mV/s.

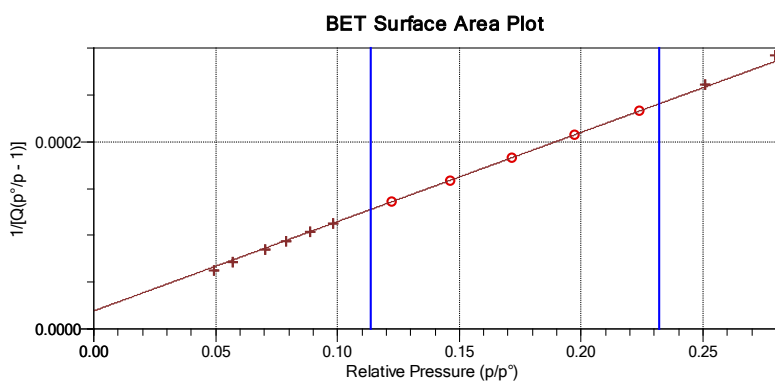

**Supplementary Figure 4** | BET surface area plots calculated by the BET equation.

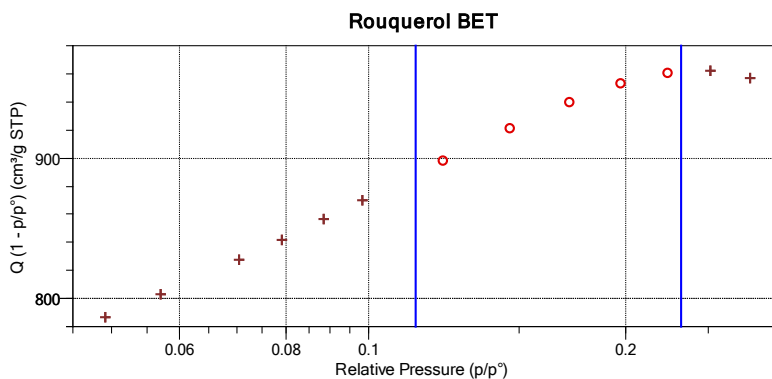

**Supplementary Figure 5** | Rouquerol plots were used to select a reasonable pressure range for BET surface area calculation where the term  $Q(1 - p/p^\circ)$  continuously increases.

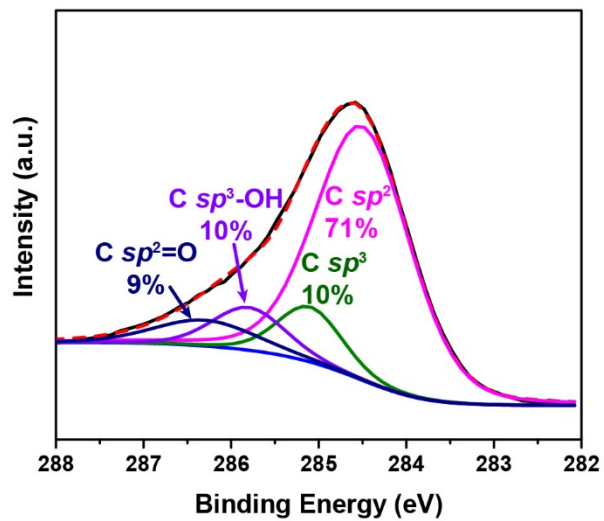

Supplementary Figure 6| C 1s XPS spectra of C-Phl.

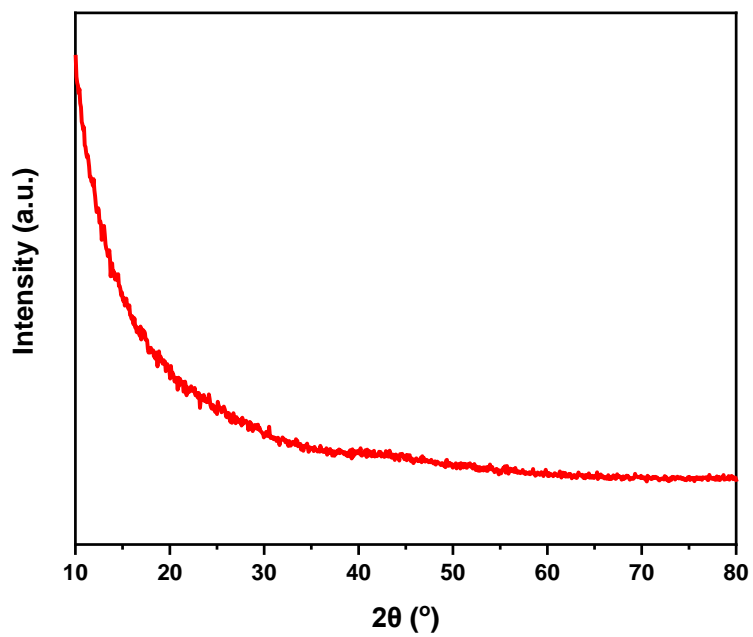

Supplementary Figure 7| Powder XRD pattern of C-Phl.

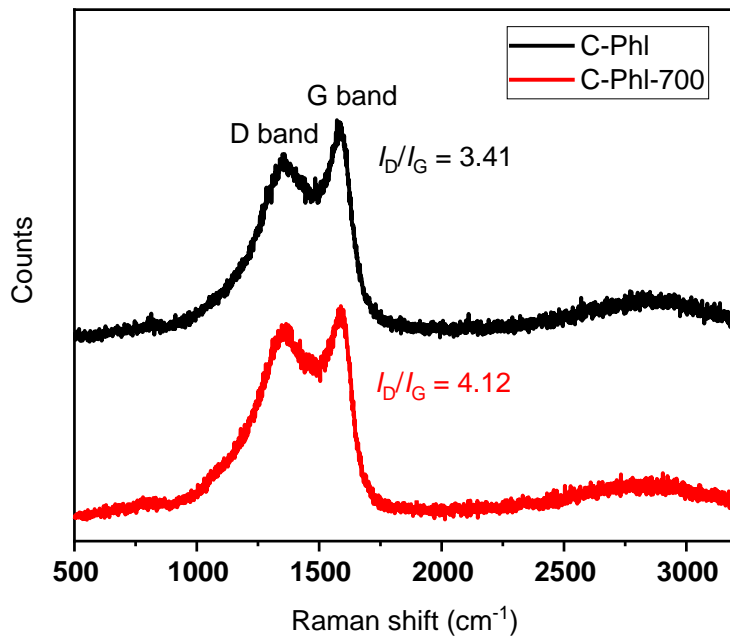

**Supplementary Figure 8| Raman spectra of C-Phl and C-Phl-700.** Raman spectra reveal the signals from the defects in the graphitic lattice (D band) at  $1353 \text{ cm}^{-1}$ , and the in-plane vibration of the  $\text{sp}^2$  carbon network (G band) at  $1590 \text{ cm}^{-1}$ . The high area ratio of D band to G band ( $I_D/I_G$ ) above 3 indicates the amorphous nature of these carbon products.

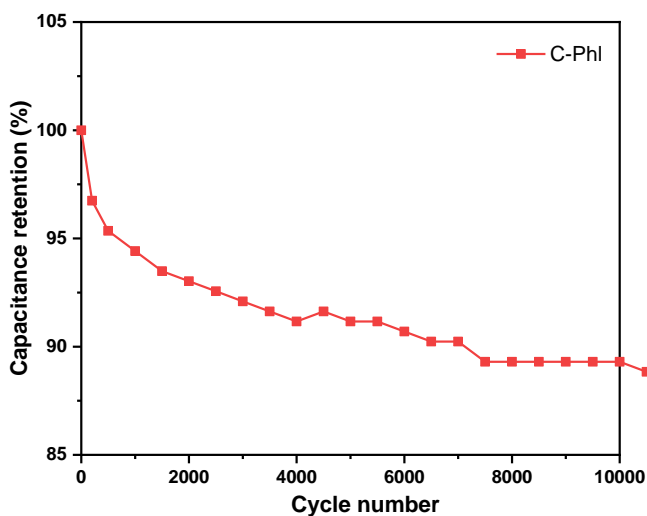

**Supplementary Figure 9| Cycling performance of C-Phl at 20 A/g using three-electrode cells at 20 °C.** The mass loading of the working electrode is  $0.7 \text{ mg/cm}^2$ .

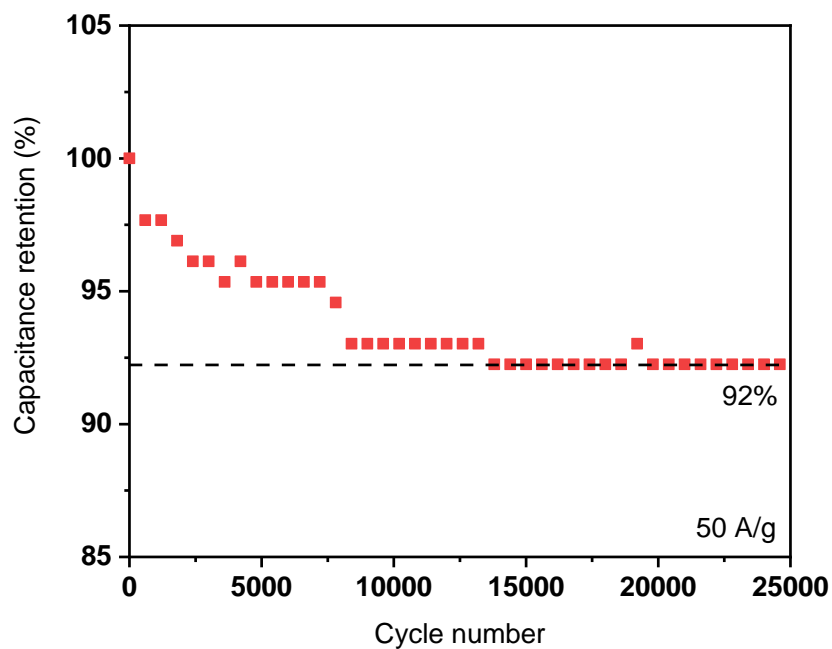

**Supplementary Figure 10| GCD Cycling performance of C-Phl at 50 A/g using three-electrode cells at 20 °C.** The mass loading of the working electrode is 0.7 mg/cm<sup>2</sup>.

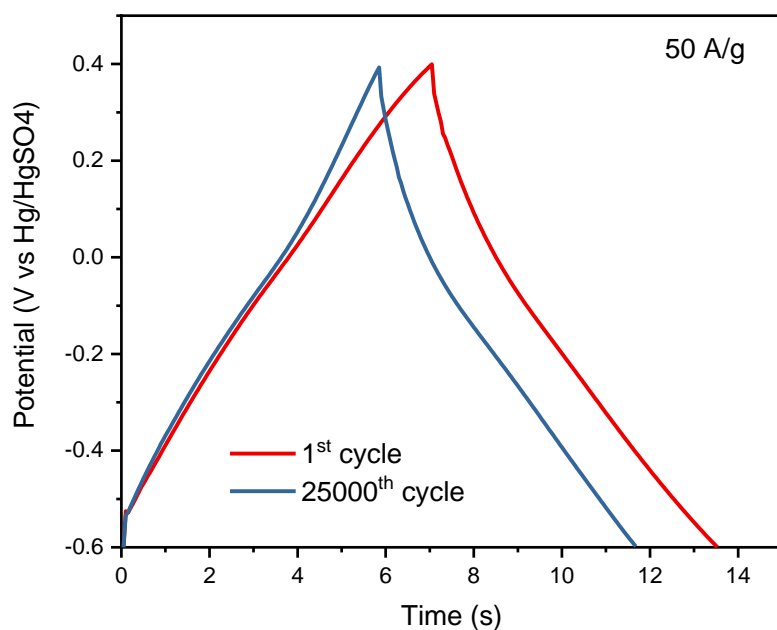

**Supplementary Figure 11. 1<sup>st</sup> and 25000<sup>th</sup> GCD curves of C-Phl at 50 A/g using three-electrode cells at 20 °C.** The mass loading of the working electrode is 0.7 mg/cm<sup>2</sup>.

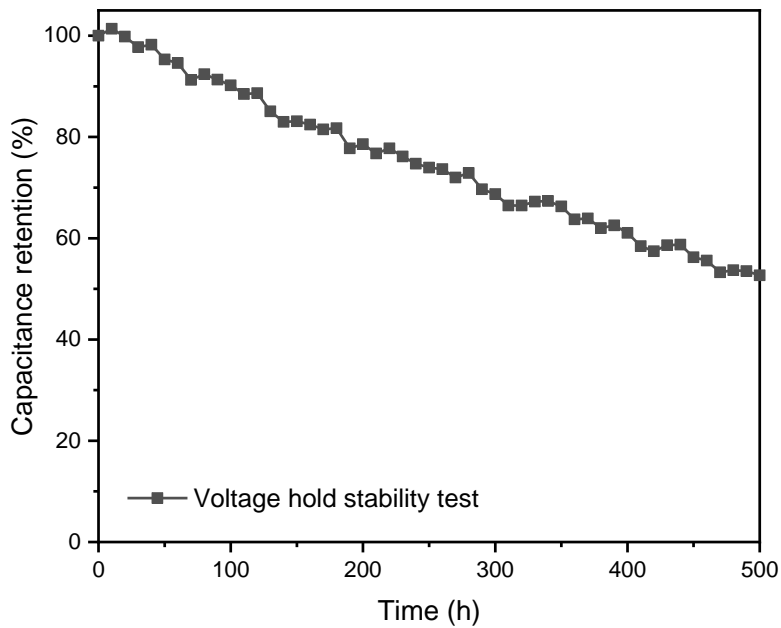

**Supplementary Figure 12| Voltage hold test using three-electrode cells at 20 °C by applying a constant up-limit potential (0.4 V vs Hg/Hg<sub>2</sub>SO<sub>4</sub>) during aging for up to 500 h. Every 10 h, four GCD cycles were performed between -0.6 V and 0.4 V vs Hg/Hg<sub>2</sub>SO<sub>4</sub> using a specific current of 20 A/g. The mass loading of the working electrode is 0.7 mg/cm<sup>2</sup>.**

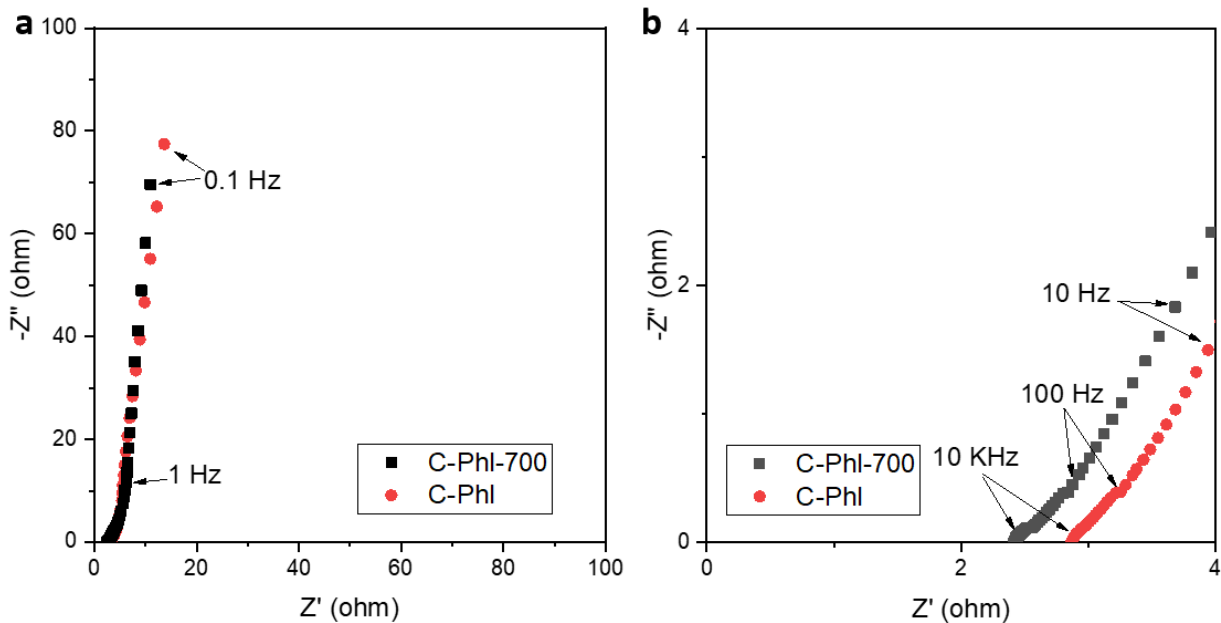

**Supplementary Figure 13** | a) Nyquist plots of three-electrode cells with C-Phl and C-Phl-700 as active materials at 20 °C. The mass loading of the working electrode is 0.7 mg/cm<sup>2</sup>. b) Zoom-in Nyquist plots at the high-frequency region of impedance.

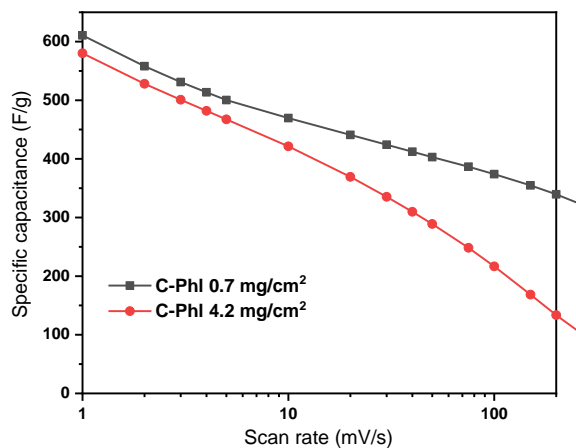

**Supplementary Figure 14** | Specific capacitance of C-Phl at different mass loadings. Three-electrode cells were used and tested at 20 °C.



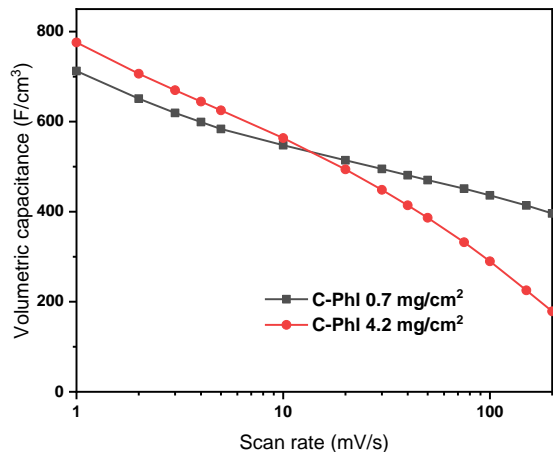

**Supplementary Figure 15| Volumetric capacitance of C-Phl at different mass loadings.** Three-electrode cells were used and tested at 20 °C.

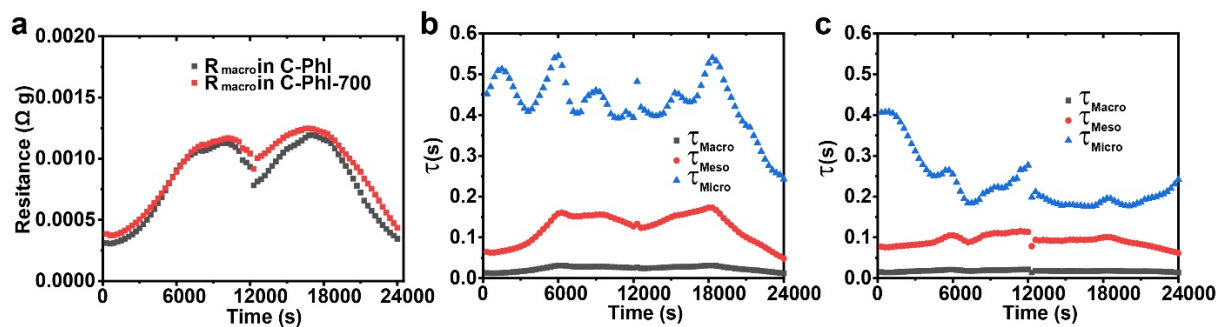

**Supplementary Figure 16| Parameters fitted from the SPECS data of C-Phl and C-Phl-700.**

a) Macropore resistances; b) time constants of C-Phl; (c) time constants of C-Phl-700. The discontinuities in the curves in Figure 4c, Supplementary Figure 16 b and c are due to the change of current direction at 12000s as shown in Figure 4a.

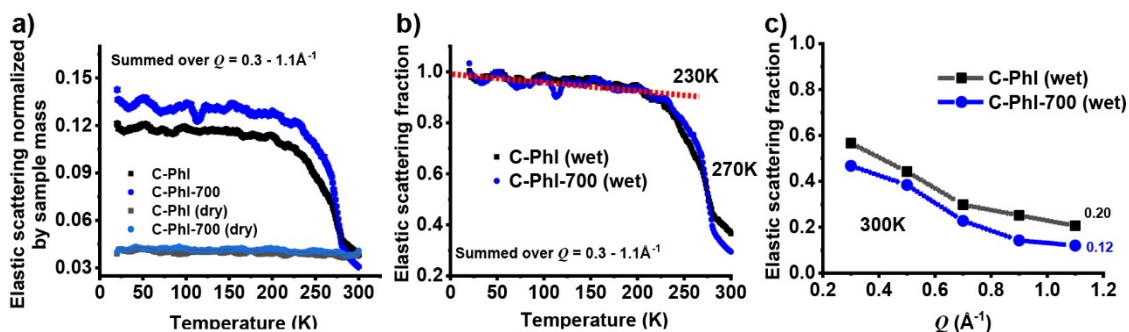

**Supplementary Figure 17| Elastic scattering intensity scans (a) normalized by the samples' mass for the dry and wet samples, and (b) for the wet samples with the datapoints at  $T = 20 \text{ K}$  normalized to unity. In both cases, the data are summed over  $Q = 0.3 - 1.1 \text{ \AA}^{-1}$ . In (c), the  $Q$ -dependences of the fraction of the elastic scattering intensities in the QENS signals at 300 K are presented. The numbers on the right-hand side indicate the elastic scattering fraction at  $Q = 1.1 \text{ \AA}^{-1}$ .**

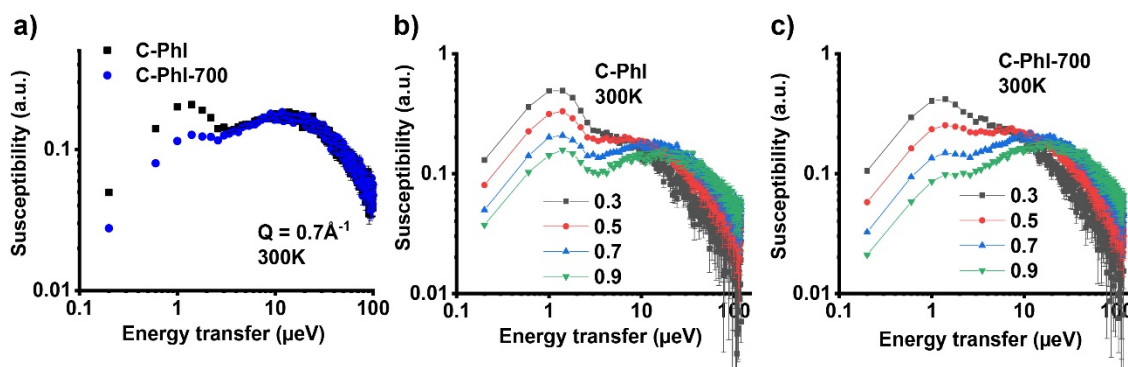

**Supplementary Figure 18| QENS spectra collected at 300K presented as (a) the dynamic susceptibilities. The data at  $Q = 0.7 \text{ \AA}^{-1}$  are shown as representative examples of the behavior of the sample. In (b) and (c), the dynamic susceptibilities are presented at different  $Q$ -values.**

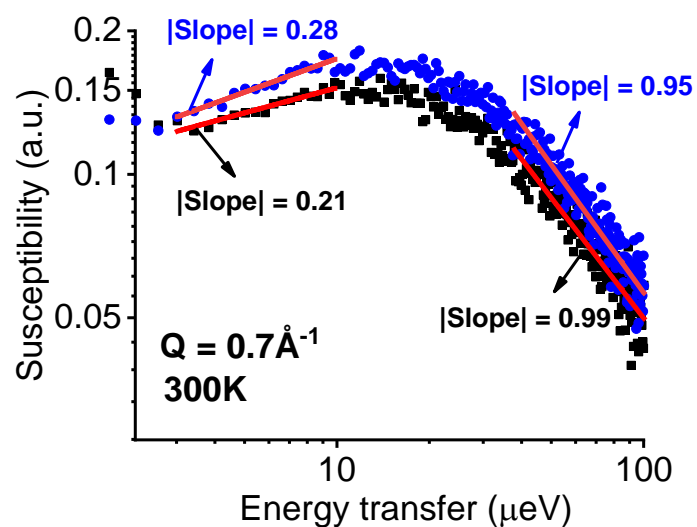

Supplementary Figure 19| The relaxations above 10  $\mu\text{eV}$  previously shown in Supplementary Figure 18a are reproduced with the slopes of the low and high-frequency sides being depicted.

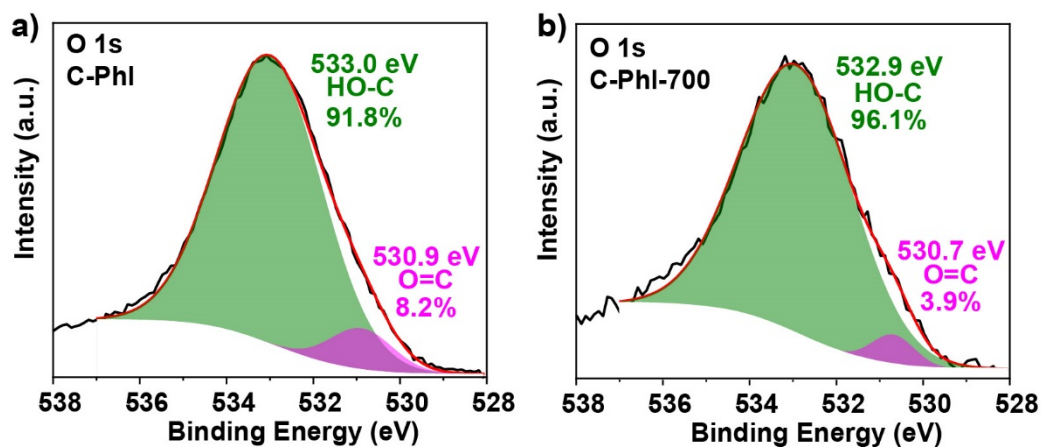

Supplementary Figure 20| The analysis of O 1s peaks for C-Phl (a) and C-Phl-700 (b).

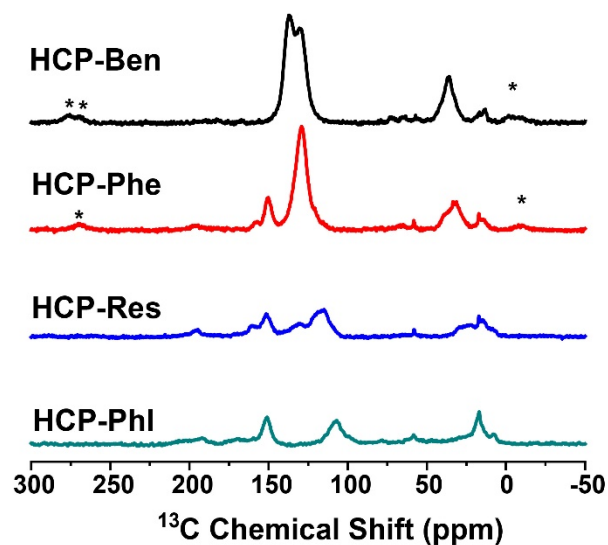

Supplementary Figure 21|  $^{13}\text{C}$  CP/MAS NMR of HCPs.

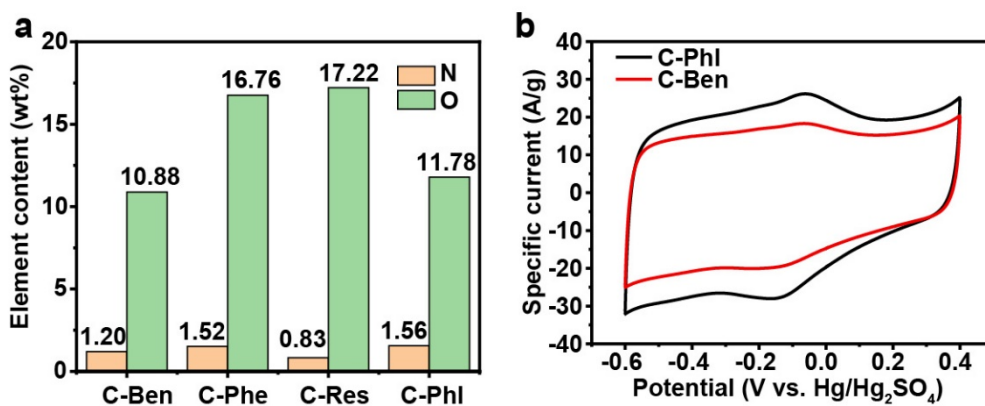

Supplementary Figure 22| N and O contents in hyperporous carbons (a) and CV curves of C-Phl and C-Ben at 50 mV/s (b). Three-electrode cells were used and tested at 20 °C. The mass loading of the working electrode is 0.7 mg/cm<sup>2</sup>.

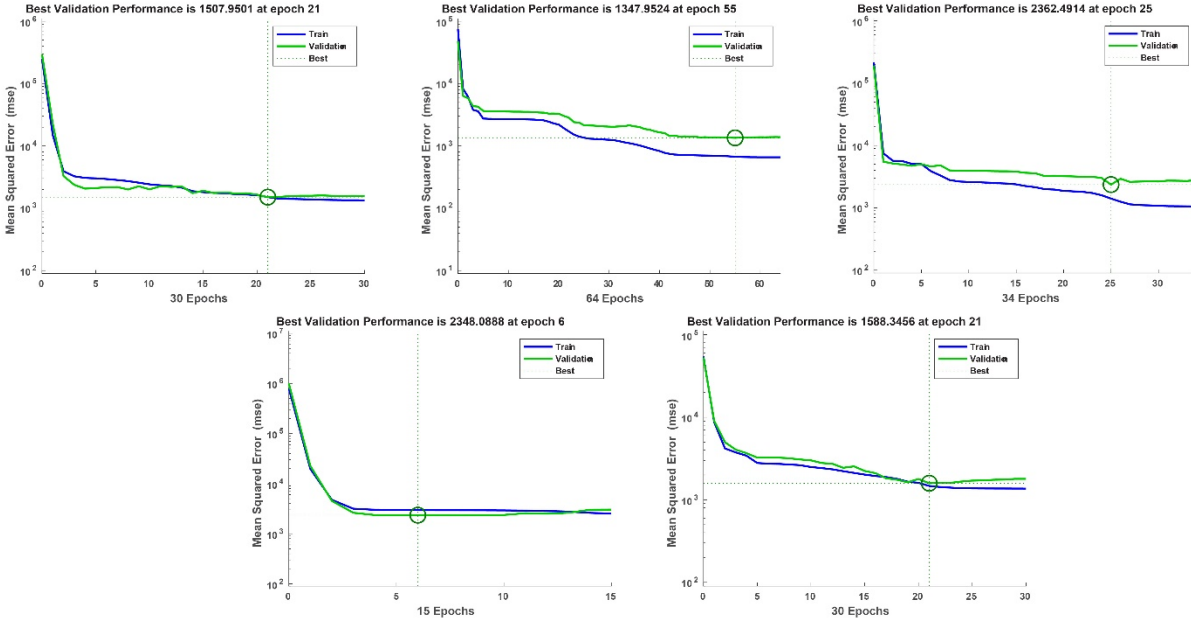

**Supplementary Figure 23| The 5-fold learning curves of the ANN model without the experimental data.** The best validation MSEs range from 1348 to 2362, corresponding to RMSEs from 36.7 to 48.6.

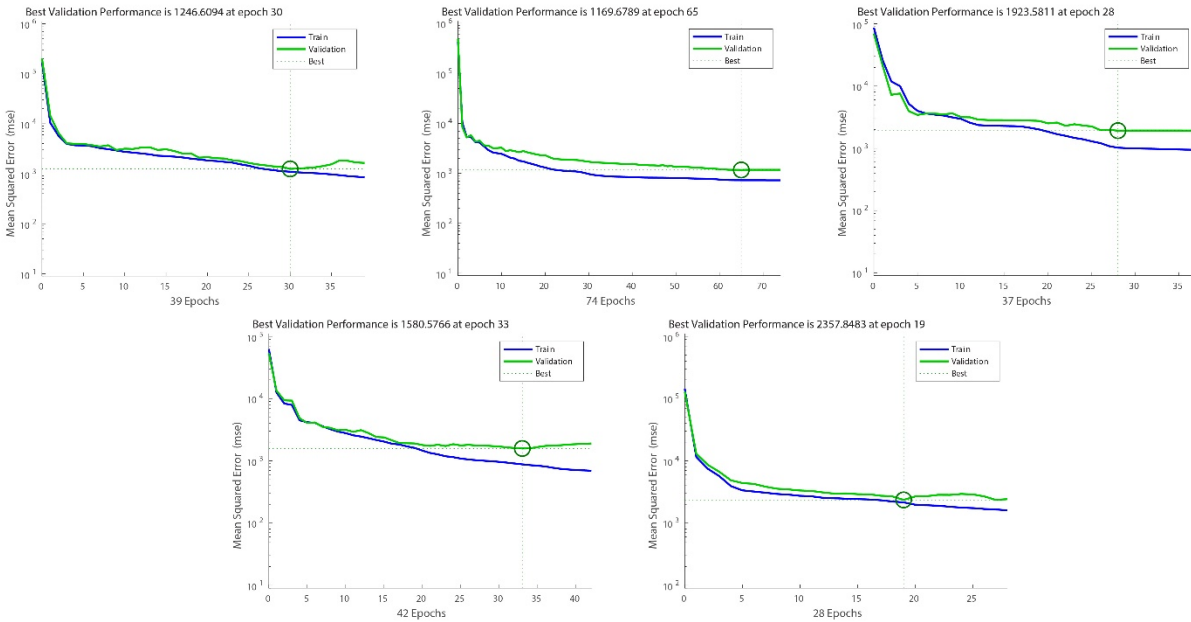

**Supplementary Figure 24| The 5-fold learning curves of the ANN model with the experimental data.** The best validation MSEs range from 1170 to 2357, corresponding to RMSEs from 36.2 to 48.5.

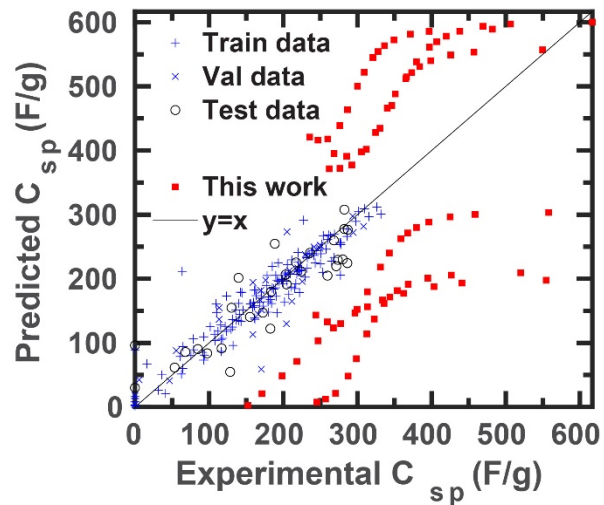

**Supplementary Figure 25| Correlated capacitance vs experimental capacitance for the ANN model without the experimental data. Train RMSE=25.0, Val RMSE=34.5, Test RMSE=38.5, Experimental data (This work) RMSE=165.8.  $C_{sp}$  means “specific capacitance”.**

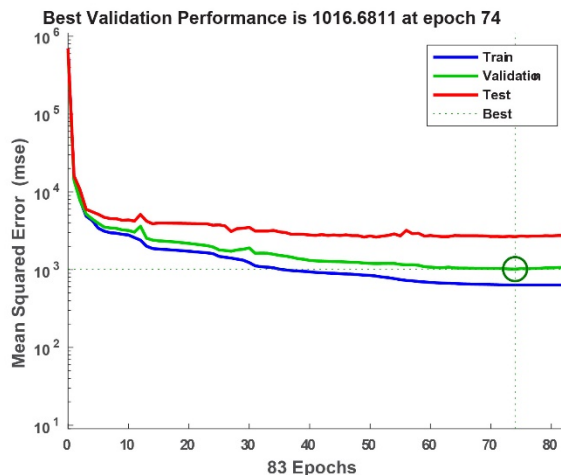

**Supplementary Figure 26| The learning curves of the ANN model with additional experimental data from this work.**

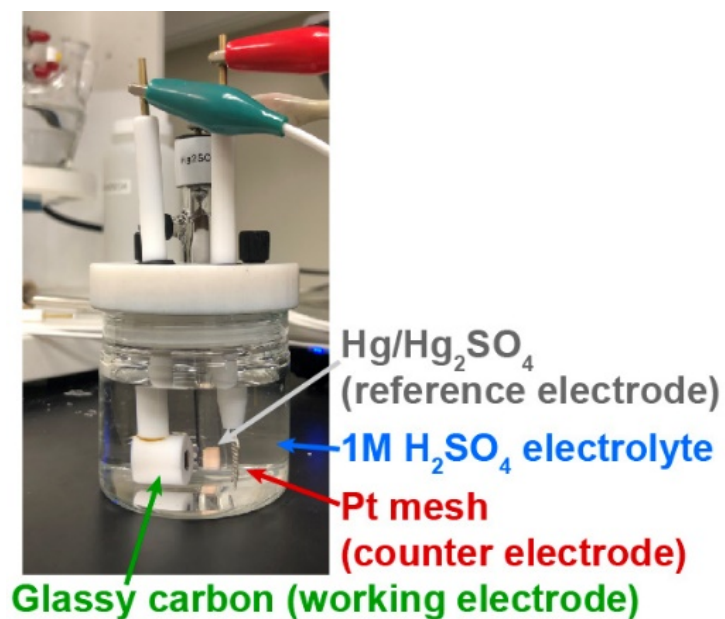

Supplementary Figure 26| Photographic picture of the cell for electrochemical tests.

Supplementary Table 1. Input and output data used in different machine learning models

| #  | C <sub>sp</sub><br>(F/g) | electrolyte | <i>v</i><br>(mV/s) | SA <sub>micro</sub><br>(m <sup>2</sup> /g) | SA <sub>meso</sub><br>(m <sup>2</sup> /g) | O<br>(at%) | N<br>(at%) |
|----|--------------------------|-------------|--------------------|--------------------------------------------|-------------------------------------------|------------|------------|
| 1  | 0                        | 6M KOH      | 1                  | 0                                          | 0                                         | 0          | 0          |
| 2  | 0                        | 6M KOH      | 300                | 0                                          | 0                                         | 0          | 0          |
| 3  | 0                        | 6M KOH      | 500                | 0                                          | 0                                         | 0          | 0          |
| 4  | 0                        | 6M KOH      | 1                  | 0                                          | 0                                         | 17         | 15.6       |
| 5  | 0                        | 6M KOH      | 300                | 0                                          | 0                                         | 17         | 15.6       |
| 6  | 0                        | 6M KOH      | 500                | 0                                          | 0                                         | 17         | 15.6       |
| 7  | 0                        | 6M KOH      | 1                  | 0                                          | 0                                         | 8.5        | 7.8        |
| 8  | 0                        | 6M KOH      | 300                | 0                                          | 0                                         | 8.5        | 7.8        |
| 9  | 0                        | 6M KOH      | 500                | 0                                          | 0                                         | 8.5        | 7.8        |
| 10 | 179.60                   | 6M KOH      | 1                  | 120                                        | 216                                       | 0          | 0          |
| 11 | 172.40                   | 6M KOH      | 2                  | 120                                        | 216                                       | 0          | 0          |
| 12 | 166.30                   | 6M KOH      | 5                  | 120                                        | 216                                       | 0          | 0          |

|    |        |        |     |     |      |      |      |
|----|--------|--------|-----|-----|------|------|------|
| 13 | 155.00 | 6M KOH | 10  | 120 | 216  | 0    | 0    |
| 14 | 211.60 | 6M KOH | 1   | 107 | 315  | 0    | 0    |
| 15 | 201.60 | 6M KOH | 2   | 107 | 315  | 0    | 0    |
| 16 | 184.20 | 6M KOH | 5   | 107 | 315  | 0    | 0    |
| 17 | 172.60 | 6M KOH | 10  | 107 | 315  | 0    | 0    |
| 18 | 277.00 | 6M KOH | 1   | 153 | 553  | 0    | 0    |
| 19 | 259.60 | 6M KOH | 2   | 153 | 553  | 0    | 0    |
| 20 | 229.50 | 6M KOH | 5   | 153 | 553  | 0    | 0    |
| 21 | 198.10 | 6M KOH | 10  | 153 | 553  | 0    | 0    |
| 22 | 280.10 | 6M KOH | 1   | 200 | 900  | 0    | 0    |
| 23 | 273.50 | 6M KOH | 2   | 200 | 900  | 0    | 0    |
| 24 | 265.20 | 6M KOH | 5   | 200 | 900  | 0    | 0    |
| 25 | 250.10 | 6M KOH | 10  | 200 | 900  | 0    | 0    |
| 26 | 224.15 | 6M KOH | 2   | 735 | 1200 | 0    | 0    |
| 27 | 202.99 | 6M KOH | 5   | 735 | 1200 | 0    | 0    |
| 28 | 189.89 | 6M KOH | 10  | 735 | 1200 | 0    | 0    |
| 29 | 176.24 | 6M KOH | 20  | 735 | 1200 | 0    | 0    |
| 30 | 144.14 | 6M KOH | 50  | 735 | 1200 | 0    | 0    |
| 31 | 113.60 | 6M KOH | 100 | 735 | 1200 | 0    | 0    |
| 32 | 143.09 | 6M KOH | 10  | 417 | 645  | 6.14 | 8.28 |
| 33 | 118.00 | 6M KOH | 50  | 417 | 645  | 6.14 | 8.28 |
| 34 | 97.41  | 6M KOH | 100 | 417 | 645  | 6.14 | 8.28 |
| 35 | 36.15  | 6M KOH | 400 | 417 | 645  | 6.14 | 8.28 |
| 36 | 163.62 | 6M KOH | 10  | 219 | 840  | 5.83 | 5.2  |
| 37 | 141.39 | 6M KOH | 50  | 219 | 840  | 5.83 | 5.2  |
| 38 | 123.27 | 6M KOH | 100 | 219 | 840  | 5.83 | 5.2  |
| 39 | 62.76  | 6M KOH | 400 | 219 | 840  | 5.83 | 5.2  |
| 40 | 139.59 | 6M KOH | 10  | 173 | 944  | 5.23 | 3.69 |
| 41 | 123.52 | 6M KOH | 50  | 173 | 944  | 5.23 | 3.69 |
| 42 | 110.26 | 6M KOH | 100 | 173 | 944  | 5.23 | 3.69 |



|    |        |        |     |      |      |       |      |
|----|--------|--------|-----|------|------|-------|------|
| 43 | 64.69  | 6M KOH | 400 | 173  | 944  | 5.23  | 3.69 |
| 44 | 276.38 | 6M KOH | 5   | 1283 | 764  | 8.43  | 0.69 |
| 45 | 249.80 | 6M KOH | 10  | 1283 | 764  | 8.43  | 0.69 |
| 46 | 239.01 | 6M KOH | 20  | 1283 | 764  | 8.43  | 0.69 |
| 47 | 222.43 | 6M KOH | 50  | 1283 | 764  | 8.43  | 0.69 |
| 48 | 204.46 | 6M KOH | 100 | 1283 | 764  | 8.43  | 0.69 |
| 49 | 190.26 | 6M KOH | 150 | 1283 | 764  | 8.43  | 0.69 |
| 50 | 179.47 | 6M KOH | 200 | 1283 | 764  | 8.43  | 0.69 |
| 51 | 168.44 | 6M KOH | 250 | 1283 | 764  | 8.43  | 0.69 |
| 52 | 286.01 | 6M KOH | 5   | 1574 | 187  | 12.28 | 2.96 |
| 53 | 268.15 | 6M KOH | 10  | 1574 | 187  | 12.28 | 2.96 |
| 54 | 249.17 | 6M KOH | 20  | 1574 | 187  | 12.28 | 2.96 |
| 55 | 208.33 | 6M KOH | 50  | 1574 | 187  | 12.28 | 2.96 |
| 56 | 159.75 | 6M KOH | 100 | 1574 | 187  | 12.28 | 2.96 |
| 57 | 131.32 | 6M KOH | 150 | 1574 | 187  | 12.28 | 2.96 |
| 58 | 282.26 | 6M KOH | 5   | 1556 | 205  | 11.72 | 2.45 |
| 59 | 282.35 | 6M KOH | 5   | 1320 | 621  | 10.52 | 1.42 |
| 60 | 205.06 | 6M KOH | 5   | 1072 | 661  | 8.39  | 0.65 |
| 61 | 188.58 | 6M KOH | 5   | 1990 | 879  | 0     | 0    |
| 62 | 232.27 | 6M KOH | 5   | 636  | 442  | 0     | 0    |
| 63 | 222.77 | 6M KOH | 10  | 636  | 442  | 0     | 0    |
| 64 | 202.29 | 6M KOH | 20  | 636  | 442  | 0     | 0    |
| 65 | 185.15 | 6M KOH | 50  | 636  | 442  | 0     | 0    |
| 66 | 155.41 | 6M KOH | 100 | 636  | 442  | 0     | 0    |
| 67 | 185.11 | 6M KOH | 5   | 713  | 290  | 0     | 0    |
| 68 | 294.33 | 6M KOH | 5   | 971  | 282  | 7.87  | 1.99 |
| 69 | 277.32 | 6M KOH | 5   | 633  | 1394 | 5.4   | 0.36 |
| 70 | 331.72 | 6M KOH | 5   | 1227 | 1170 | 7.87  | 2.72 |
| 71 | 315.50 | 6M KOH | 10  | 1227 | 1170 | 7.87  | 2.72 |
| 72 | 297.85 | 6M KOH | 20  | 1227 | 1170 | 7.87  | 2.72 |

|     |        |        |     |      |      |       |      |
|-----|--------|--------|-----|------|------|-------|------|
| 73  | 260.99 | 6M KOH | 50  | 1227 | 1170 | 7.87  | 2.72 |
| 74  | 219.73 | 6M KOH | 100 | 1227 | 1170 | 7.87  | 2.72 |
| 75  | 205.49 | 6M KOH | 200 | 1227 | 1170 | 7.87  | 2.72 |
| 76  | 116.85 | 6M KOH | 2   | 0    | 24   | 0     | 0    |
| 77  | 79.11  | 6M KOH | 5   | 0    | 24   | 0     | 0    |
| 78  | 68.03  | 6M KOH | 10  | 0    | 24   | 0     | 0    |
| 79  | 61.20  | 6M KOH | 20  | 0    | 24   | 0     | 0    |
| 80  | 53.48  | 6M KOH | 50  | 0    | 24   | 0     | 0    |
| 81  | 46.58  | 6M KOH | 100 | 0    | 24   | 0     | 0    |
| 82  | 41.30  | 6M KOH | 200 | 0    | 24   | 0     | 0    |
| 83  | 31.42  | 6M KOH | 500 | 0    | 24   | 0     | 0    |
| 84  | 257.94 | 6M KOH | 2   | 115  | 1158 | 0     | 0    |
| 85  | 244.31 | 6M KOH | 5   | 115  | 1158 | 0     | 0    |
| 86  | 238.34 | 6M KOH | 10  | 115  | 1158 | 0     | 0    |
| 87  | 232.37 | 6M KOH | 20  | 115  | 1158 | 0     | 0    |
| 88  | 224.65 | 6M KOH | 50  | 115  | 1158 | 0     | 0    |
| 89  | 216.90 | 6M KOH | 100 | 115  | 1158 | 0     | 0    |
| 90  | 207.36 | 6M KOH | 200 | 115  | 1158 | 0     | 0    |
| 91  | 187.26 | 6M KOH | 500 | 115  | 1158 | 0     | 0    |
| 92  | 326.17 | 6M KOH | 2   | 327  | 1280 | 6.8   | 4.8  |
| 93  | 309.45 | 6M KOH | 5   | 327  | 1280 | 6.8   | 4.8  |
| 94  | 301.53 | 6M KOH | 10  | 327  | 1280 | 6.8   | 4.8  |
| 95  | 293.59 | 6M KOH | 20  | 327  | 1280 | 6.8   | 4.8  |
| 96  | 285.63 | 6M KOH | 50  | 327  | 1280 | 6.8   | 4.8  |
| 97  | 277.62 | 6M KOH | 100 | 327  | 1280 | 6.8   | 4.8  |
| 98  | 268.66 | 6M KOH | 200 | 327  | 1280 | 6.8   | 4.8  |
| 99  | 250.54 | 6M KOH | 500 | 327  | 1280 | 6.8   | 4.8  |
| 100 | 142.17 | 6M KOH | 10  | 250  | 52   | 12.18 | 0    |
| 101 | 219.60 | 6M KOH | 5   | 275  | 349  | 8.34  | 0    |
| 102 | 206.82 | 6M KOH | 10  | 275  | 349  | 8.34  | 0    |

|     |        |        |     |      |     |       |      |
|-----|--------|--------|-----|------|-----|-------|------|
| 103 | 180.00 | 6M KOH | 50  | 275  | 349 | 8.34  | 0    |
| 104 | 161.31 | 6M KOH | 100 | 275  | 349 | 8.34  | 0    |
| 105 | 182.58 | 6M KOH | 5   | 437  | 10  | 0     | 0    |
| 106 | 161.70 | 6M KOH | 50  | 437  | 10  | 0     | 0    |
| 107 | 158.97 | 6M KOH | 100 | 437  | 10  | 0     | 0    |
| 108 | 221.86 | 6M KOH | 5   | 501  | 25  | 0     | 0    |
| 109 | 191.76 | 6M KOH | 50  | 501  | 25  | 0     | 0    |
| 110 | 182.59 | 6M KOH | 100 | 501  | 25  | 0     | 0    |
| 111 | 159.09 | 6M KOH | 5   | 579  | 83  | 0     | 0    |
| 112 | 139.68 | 6M KOH | 50  | 579  | 83  | 0     | 0    |
| 113 | 136.66 | 6M KOH | 100 | 579  | 83  | 0     | 0    |
| 114 | 170.51 | 6M KOH | 10  | 457  | 126 | 0     | 0    |
| 115 | 101.47 | 6M KOH | 100 | 457  | 126 | 0     | 0    |
| 116 | 160.84 | 6M KOH | 10  | 429  | 188 | 0     | 0    |
| 117 | 115.52 | 6M KOH | 100 | 429  | 188 | 0     | 0    |
| 118 | 253.90 | 6M KOH | 10  | 1118 | 504 | 6.22  | 0    |
| 119 | 203.05 | 6M KOH | 100 | 1118 | 504 | 6.22  | 0    |
| 120 | 116.25 | 6M KOH | 30  | 454  | 98  | 14.34 | 5.77 |
| 121 | 129.80 | 6M KOH | 30  | 160  | 497 | 14.67 | 3.85 |
| 122 | 218.12 | 6M KOH | 10  | 259  | 633 | 17.19 | 3.68 |
| 123 | 204.33 | 6M KOH | 20  | 259  | 633 | 17.19 | 3.68 |
| 124 | 189.73 | 6M KOH | 30  | 259  | 633 | 17.19 | 3.68 |
| 125 | 169.17 | 6M KOH | 50  | 259  | 633 | 17.19 | 3.68 |
| 126 | 121.63 | 6M KOH | 100 | 259  | 633 | 17.19 | 3.68 |
| 127 | 219.55 | 6M KOH | 10  | 1052 | 253 | 7.81  | 4.36 |
| 128 | 286.41 | 6M KOH | 5   | 1462 | 327 | 5.35  | 6.05 |
| 129 | 271.37 | 6M KOH | 10  | 1462 | 327 | 5.35  | 6.05 |
| 130 | 253.23 | 6M KOH | 20  | 1462 | 327 | 5.35  | 6.05 |
| 131 | 215.46 | 6M KOH | 50  | 1462 | 327 | 5.35  | 6.05 |
| 132 | 170.36 | 6M KOH | 100 | 1462 | 327 | 5.35  | 6.05 |

|     |        |        |     |      |      |       |       |
|-----|--------|--------|-----|------|------|-------|-------|
| 133 | 243.03 | 6M KOH | 10  | 1133 | 279  | 7.97  | 4.6   |
| 134 | 218.08 | 6M KOH | 10  | 897  | 233  | 7.69  | 3.68  |
| 135 | 211.06 | 6M KOH | 10  | 567  | 293  | 7.54  | 2.91  |
| 136 | 204.29 | 6M KOH | 10  | 824  | 298  | 7.2   | 8.46  |
| 137 | 209.60 | 6M KOH | 10  | 1307 | 258  | 5.88  | 4.69  |
| 138 | 193.37 | 6M KOH | 10  | 1099 | 182  | 5.95  | 2.86  |
| 139 | 132.27 | 6M KOH | 10  | 1412 | 66   | 7.89  | 8.71  |
| 140 | 55.71  | 6M KOH | 20  | 1412 | 66   | 7.89  | 8.71  |
| 141 | 16.13  | 6M KOH | 50  | 1412 | 66   | 7.89  | 8.71  |
| 142 | 5.72   | 6M KOH | 100 | 1412 | 66   | 7.89  | 8.71  |
| 143 | 91.28  | 6M KOH | 10  | 889  | 51   | 10.91 | 8.61  |
| 144 | 78.59  | 6M KOH | 10  | 952  | 74   | 8.38  | 7.33  |
| 145 | 92.56  | 6M KOH | 10  | 1260 | 41   | 9.79  | 7.14  |
| 146 | 92.60  | 6M KOH | 10  | 752  | 16   | 12.57 | 8.83  |
| 147 | 107.39 | 6M KOH | 10  | 2316 | 115  | 4.94  | 5.1   |
| 148 | 109.51 | 6M KOH | 10  | 1534 | 63   | 6.68  | 3.47  |
| 149 | 241.41 | 6M KOH | 10  | 1809 | 319  | 12.45 | 7.88  |
| 150 | 308.22 | 6M KOH | 5   | 1976 | 403  | 7.91  | 6.13  |
| 151 | 286.94 | 6M KOH | 10  | 1976 | 403  | 7.91  | 6.13  |
| 152 | 263.59 | 6M KOH | 20  | 1976 | 403  | 7.91  | 6.13  |
| 153 | 234.99 | 6M KOH | 50  | 1976 | 403  | 7.91  | 6.13  |
| 154 | 199.04 | 6M KOH | 100 | 1976 | 403  | 7.91  | 6.13  |
| 155 | 252.16 | 6M KOH | 10  | 1552 | 369  | 8.37  | 5.8   |
| 156 | 170.33 | 6M KOH | 10  | 562  | 128  | 11.09 | 9.23  |
| 157 | 227.24 | 6M KOH | 10  | 779  | 1003 | 8.16  | 4.52  |
| 158 | 211.43 | 6M KOH | 10  | 443  | 804  | 9.83  | 2.1   |
| 159 | 93.58  | 6M KOH | 50  | 517  | 61   | 5.16  | 13.68 |
| 160 | 128.36 | 6M KOH | 50  | 640  | 184  | 6.25  | 9.57  |
| 161 | 75.50  | 6M KOH | 50  | 563  | 120  | 8.49  | 5.38  |
| 162 | 178.10 | 6M KOH | 20  | 680  | 641  | 7.84  | 7.02  |

|     |          |                                   |     |      |      |       |      |
|-----|----------|-----------------------------------|-----|------|------|-------|------|
| 163 | 162.84   | 6M KOH                            | 50  | 680  | 641  | 7.84  | 7.02 |
| 164 | 130.15   | 6M KOH                            | 100 | 680  | 641  | 7.84  | 7.02 |
| 165 | 63.69    | 6M KOH                            | 50  | 0    | 1082 | 0     | 0    |
| 166 | 268.95   | 6M KOH                            | 10  | 1590 | 1030 | 14.97 | 0    |
| 167 | 259.77   | 6M KOH                            | 20  | 1590 | 1030 | 14.97 | 0    |
| 168 | 229.67   | 6M KOH                            | 50  | 1590 | 1030 | 14.97 | 0    |
| 169 | 197.38   | 6M KOH                            | 100 | 1590 | 1030 | 14.97 | 0    |
| 170 | 135.83   | 6M KOH                            | 200 | 1590 | 1030 | 14.97 | 0    |
| 171 | 0        | 1M H <sub>2</sub> SO <sub>4</sub> | 1   | 0    | 0    | 0     | 0    |
| 172 | 0        | 1M H <sub>2</sub> SO <sub>4</sub> | 300 | 0    | 0    | 0     | 0    |
| 173 | 0        | 1M H <sub>2</sub> SO <sub>4</sub> | 500 | 0    | 0    | 0     | 0    |
| 174 | 0        | 1M H <sub>2</sub> SO <sub>4</sub> | 1   | 0    | 0    | 17    | 15.6 |
| 175 | 0        | 1M H <sub>2</sub> SO <sub>4</sub> | 300 | 0    | 0    | 17    | 15.6 |
| 176 | 0        | 1M H <sub>2</sub> SO <sub>4</sub> | 500 | 0    | 0    | 17    | 15.6 |
| 177 | 0        | 1M H <sub>2</sub> SO <sub>4</sub> | 1   | 0    | 0    | 8.5   | 7.8  |
| 178 | 0        | 1M H <sub>2</sub> SO <sub>4</sub> | 300 | 0    | 0    | 8.5   | 7.8  |
| 179 | 0        | 1M H <sub>2</sub> SO <sub>4</sub> | 500 | 0    | 0    | 8.5   | 7.8  |
| 180 | 64.47793 | 1M H <sub>2</sub> SO <sub>4</sub> | 100 | 1806 | 113  | 6.18  | 0    |
| 181 | 84.81906 | 1M H <sub>2</sub> SO <sub>4</sub> | 100 | 1566 | 116  | 10.97 | 0    |
| 182 | 112.0273 | 1M H <sub>2</sub> SO <sub>4</sub> | 100 | 1396 | 160  | 11.39 | 0    |
| 183 | 131.7777 | 1M H <sub>2</sub> SO <sub>4</sub> | 100 | 1347 | 84   | 13.86 | 0    |
| 184 | 236.0384 | 1M H <sub>2</sub> SO <sub>4</sub> | 5   | 1303 | 2397 | 7.8   | 7.7  |
| 185 | 230.6941 | 1M H <sub>2</sub> SO <sub>4</sub> | 10  | 1303 | 2397 | 7.8   | 7.7  |
| 186 | 217.1656 | 1M H <sub>2</sub> SO <sub>4</sub> | 20  | 1303 | 2397 | 7.8   | 7.7  |
| 187 | 191.6747 | 1M H <sub>2</sub> SO <sub>4</sub> | 50  | 1303 | 2397 | 7.8   | 7.7  |
| 188 | 161.1088 | 1M H <sub>2</sub> SO <sub>4</sub> | 100 | 1303 | 2397 | 7.8   | 7.7  |
| 189 | 241.4567 | 1M H <sub>2</sub> SO <sub>4</sub> | 10  | 1172 | 350  | 17.72 | 6.43 |
| 190 | 219.8804 | 1M H <sub>2</sub> SO <sub>4</sub> | 20  | 1172 | 350  | 17.72 | 6.43 |
| 191 | 193.6414 | 1M H <sub>2</sub> SO <sub>4</sub> | 50  | 1172 | 350  | 17.72 | 6.43 |
| 192 | 158.8219 | 1M H <sub>2</sub> SO <sub>4</sub> | 100 | 1172 | 350  | 17.72 | 6.43 |

|     |          |                                   |     |      |     |       |      |
|-----|----------|-----------------------------------|-----|------|-----|-------|------|
| 193 | 108.1825 | 1M H <sub>2</sub> SO <sub>4</sub> | 200 | 1172 | 350 | 17.72 | 6.43 |
| 194 | 177.1411 | 1M H <sub>2</sub> SO <sub>4</sub> | 10  | 1167 | 330 | 9.25  | 6.9  |
| 195 | 169.7676 | 1M H <sub>2</sub> SO <sub>4</sub> | 20  | 1167 | 330 | 9.25  | 6.9  |
| 196 | 155.8553 | 1M H <sub>2</sub> SO <sub>4</sub> | 50  | 1167 | 330 | 9.25  | 6.9  |
| 197 | 139.566  | 1M H <sub>2</sub> SO <sub>4</sub> | 100 | 1167 | 330 | 9.25  | 6.9  |
| 198 | 116.0936 | 1M H <sub>2</sub> SO <sub>4</sub> | 200 | 1167 | 330 | 9.25  | 6.9  |
| 199 | 225.6605 | 1M H <sub>2</sub> SO <sub>4</sub> | 5   | 657  | 680 | 7.91  | 4.26 |
| 200 | 200.2923 | 1M H <sub>2</sub> SO <sub>4</sub> | 10  | 657  | 680 | 7.91  | 4.26 |
| 201 | 183.7029 | 1M H <sub>2</sub> SO <sub>4</sub> | 30  | 657  | 680 | 7.91  | 4.26 |
| 202 | 170.0879 | 1M H <sub>2</sub> SO <sub>4</sub> | 50  | 657  | 680 | 7.91  | 4.26 |
| 203 | 145.7881 | 1M H <sub>2</sub> SO <sub>4</sub> | 100 | 657  | 680 | 7.91  | 4.26 |
| 204 | 113.5456 | 1M H <sub>2</sub> SO <sub>4</sub> | 200 | 657  | 680 | 7.91  | 4.26 |
| 205 | 549.57   | 1M H <sub>2</sub> SO <sub>4</sub> | 1   | 3403 | 498 | 6.71  | 1.24 |
| 206 | 457.05   | 1M H <sub>2</sub> SO <sub>4</sub> | 5   | 3403 | 498 | 6.71  | 1.24 |
| 207 | 425.67   | 1M H <sub>2</sub> SO <sub>4</sub> | 10  | 3403 | 498 | 6.71  | 1.24 |
| 208 | 398.97   | 1M H <sub>2</sub> SO <sub>4</sub> | 20  | 3403 | 498 | 6.71  | 1.24 |
| 209 | 383.80   | 1M H <sub>2</sub> SO <sub>4</sub> | 30  | 3403 | 498 | 6.71  | 1.24 |
| 210 | 373.11   | 1M H <sub>2</sub> SO <sub>4</sub> | 40  | 3403 | 498 | 6.71  | 1.24 |
| 211 | 364.99   | 1M H <sub>2</sub> SO <sub>4</sub> | 50  | 3403 | 498 | 6.71  | 1.24 |
| 212 | 350.91   | 1M H <sub>2</sub> SO <sub>4</sub> | 75  | 3403 | 498 | 6.71  | 1.24 |
| 213 | 340.23   | 1M H <sub>2</sub> SO <sub>4</sub> | 100 | 3403 | 498 | 6.71  | 1.24 |
| 214 | 324.43   | 1M H <sub>2</sub> SO <sub>4</sub> | 150 | 3403 | 498 | 6.71  | 1.24 |
| 215 | 312.07   | 1M H <sub>2</sub> SO <sub>4</sub> | 200 | 3403 | 498 | 6.71  | 1.24 |
| 216 | 292.45   | 1M H <sub>2</sub> SO <sub>4</sub> | 300 | 3403 | 498 | 6.71  | 1.24 |
| 217 | 276.32   | 1M H <sub>2</sub> SO <sub>4</sub> | 400 | 3403 | 498 | 6.71  | 1.24 |
| 218 | 262.06   | 1M H <sub>2</sub> SO <sub>4</sub> | 500 | 3403 | 498 | 6.71  | 1.24 |
| 219 | 520.29   | 1M H <sub>2</sub> SO <sub>4</sub> | 1   | 2708 | 253 | 16.76 | 1.52 |
| 220 | 426.43   | 1M H <sub>2</sub> SO <sub>4</sub> | 5   | 2708 | 253 | 16.76 | 1.52 |
| 221 | 394.85   | 1M H <sub>2</sub> SO <sub>4</sub> | 10  | 2708 | 253 | 16.76 | 1.52 |
| 222 | 368.50   | 1M H <sub>2</sub> SO <sub>4</sub> | 20  | 2708 | 253 | 16.76 | 1.52 |

|     |        |                                   |     |      |     |       |      |
|-----|--------|-----------------------------------|-----|------|-----|-------|------|
| 223 | 353.79 | 1M H <sub>2</sub> SO <sub>4</sub> | 30  | 2708 | 253 | 16.76 | 1.52 |
| 224 | 343.66 | 1M H <sub>2</sub> SO <sub>4</sub> | 40  | 2708 | 253 | 16.76 | 1.52 |
| 225 | 335.86 | 1M H <sub>2</sub> SO <sub>4</sub> | 50  | 2708 | 253 | 16.76 | 1.52 |
| 226 | 322.71 | 1M H <sub>2</sub> SO <sub>4</sub> | 75  | 2708 | 253 | 16.76 | 1.52 |
| 227 | 312.78 | 1M H <sub>2</sub> SO <sub>4</sub> | 100 | 2708 | 253 | 16.76 | 1.52 |
| 228 | 298.44 | 1M H <sub>2</sub> SO <sub>4</sub> | 150 | 2708 | 253 | 16.76 | 1.52 |
| 229 | 287.41 | 1M H <sub>2</sub> SO <sub>4</sub> | 200 | 2708 | 253 | 16.76 | 1.52 |
| 230 | 270.43 | 1M H <sub>2</sub> SO <sub>4</sub> | 300 | 2708 | 253 | 16.76 | 1.52 |
| 231 | 256.94 | 1M H <sub>2</sub> SO <sub>4</sub> | 400 | 2708 | 253 | 16.76 | 1.52 |
| 232 | 245.36 | 1M H <sub>2</sub> SO <sub>4</sub> | 500 | 2708 | 253 | 16.76 | 1.52 |
| 233 | 557.82 | 1M H <sub>2</sub> SO <sub>4</sub> | 1   | 2796 | 540 | 17.22 | 0.83 |
| 234 | 458.60 | 1M H <sub>2</sub> SO <sub>4</sub> | 5   | 2796 | 540 | 17.22 | 0.83 |
| 235 | 425.05 | 1M H <sub>2</sub> SO <sub>4</sub> | 10  | 2796 | 540 | 17.22 | 0.83 |
| 236 | 396.20 | 1M H <sub>2</sub> SO <sub>4</sub> | 20  | 2796 | 540 | 17.22 | 0.83 |
| 237 | 379.57 | 1M H <sub>2</sub> SO <sub>4</sub> | 30  | 2796 | 540 | 17.22 | 0.83 |
| 238 | 367.84 | 1M H <sub>2</sub> SO <sub>4</sub> | 40  | 2796 | 540 | 17.22 | 0.83 |
| 239 | 358.75 | 1M H <sub>2</sub> SO <sub>4</sub> | 50  | 2796 | 540 | 17.22 | 0.83 |
| 240 | 343.08 | 1M H <sub>2</sub> SO <sub>4</sub> | 75  | 2796 | 540 | 17.22 | 0.83 |
| 241 | 331.07 | 1M H <sub>2</sub> SO <sub>4</sub> | 100 | 2796 | 540 | 17.22 | 0.83 |
| 242 | 313.26 | 1M H <sub>2</sub> SO <sub>4</sub> | 150 | 2796 | 540 | 17.22 | 0.83 |
| 243 | 299.34 | 1M H <sub>2</sub> SO <sub>4</sub> | 200 | 2796 | 540 | 17.22 | 0.83 |
| 244 | 277.38 | 1M H <sub>2</sub> SO <sub>4</sub> | 300 | 2796 | 540 | 17.22 | 0.83 |
| 245 | 259.52 | 1M H <sub>2</sub> SO <sub>4</sub> | 400 | 2796 | 540 | 17.22 | 0.83 |
| 246 | 243.92 | 1M H <sub>2</sub> SO <sub>4</sub> | 500 | 2796 | 540 | 17.22 | 0.83 |
| 247 | 616.64 | 1M H <sub>2</sub> SO <sub>4</sub> | 1   | 3650 | 826 | 11.78 | 1.56 |
| 248 | 506.54 | 1M H <sub>2</sub> SO <sub>4</sub> | 5   | 3650 | 826 | 11.78 | 1.56 |
| 249 | 469.49 | 1M H <sub>2</sub> SO <sub>4</sub> | 10  | 3650 | 826 | 11.78 | 1.56 |
| 250 | 437.89 | 1M H <sub>2</sub> SO <sub>4</sub> | 20  | 3650 | 826 | 11.78 | 1.56 |
| 251 | 419.71 | 1M H <sub>2</sub> SO <sub>4</sub> | 30  | 3650 | 826 | 11.78 | 1.56 |
| 252 | 406.83 | 1M H <sub>2</sub> SO <sub>4</sub> | 40  | 3650 | 826 | 11.78 | 1.56 |

|     |        |                                   |     |      |     |       |      |
|-----|--------|-----------------------------------|-----|------|-----|-------|------|
| 253 | 396.92 | 1M H <sub>2</sub> SO <sub>4</sub> | 50  | 3650 | 826 | 11.78 | 1.56 |
| 254 | 379.58 | 1M H <sub>2</sub> SO <sub>4</sub> | 75  | 3650 | 826 | 11.78 | 1.56 |
| 255 | 366.18 | 1M H <sub>2</sub> SO <sub>4</sub> | 100 | 3650 | 826 | 11.78 | 1.56 |
| 256 | 346.25 | 1M H <sub>2</sub> SO <sub>4</sub> | 150 | 3650 | 826 | 11.78 | 1.56 |
| 257 | 330.45 | 1M H <sub>2</sub> SO <sub>4</sub> | 200 | 3650 | 826 | 11.78 | 1.56 |
| 258 | 305.49 | 1M H <sub>2</sub> SO <sub>4</sub> | 300 | 3650 | 826 | 11.78 | 1.56 |
| 259 | 285.47 | 1M H <sub>2</sub> SO <sub>4</sub> | 400 | 3650 | 826 | 11.78 | 1.56 |
| 260 | 268.47 | 1M H <sub>2</sub> SO <sub>4</sub> | 500 | 3650 | 826 | 11.78 | 1.56 |
| 261 | 481.92 | 1M H <sub>2</sub> SO <sub>4</sub> | 1   | 3144 | 909 | 4.46  | 1.27 |
| 262 | 396.66 | 1M H <sub>2</sub> SO <sub>4</sub> | 5   | 3144 | 909 | 4.46  | 1.27 |
| 263 | 371.29 | 1M H <sub>2</sub> SO <sub>4</sub> | 10  | 3144 | 909 | 4.46  | 1.27 |
| 264 | 349.30 | 1M H <sub>2</sub> SO <sub>4</sub> | 20  | 3144 | 909 | 4.46  | 1.27 |
| 265 | 336.61 | 1M H <sub>2</sub> SO <sub>4</sub> | 30  | 3144 | 909 | 4.46  | 1.27 |
| 266 | 327.80 | 1M H <sub>2</sub> SO <sub>4</sub> | 40  | 3144 | 909 | 4.46  | 1.27 |
| 267 | 320.93 | 1M H <sub>2</sub> SO <sub>4</sub> | 50  | 3144 | 909 | 4.46  | 1.27 |
| 268 | 309.12 | 1M H <sub>2</sub> SO <sub>4</sub> | 75  | 3144 | 909 | 4.46  | 1.27 |
| 269 | 300.02 | 1M H <sub>2</sub> SO <sub>4</sub> | 100 | 3144 | 909 | 4.46  | 1.27 |
| 270 | 286.64 | 1M H <sub>2</sub> SO <sub>4</sub> | 150 | 3144 | 909 | 4.46  | 1.27 |
| 271 | 276.19 | 1M H <sub>2</sub> SO <sub>4</sub> | 200 | 3144 | 909 | 4.46  | 1.27 |
| 272 | 259.88 | 1M H <sub>2</sub> SO <sub>4</sub> | 300 | 3144 | 909 | 4.46  | 1.27 |
| 273 | 246.73 | 1M H <sub>2</sub> SO <sub>4</sub> | 400 | 3144 | 909 | 4.46  | 1.27 |
| 274 | 235.37 | 1M H <sub>2</sub> SO <sub>4</sub> | 500 | 3144 | 909 | 4.46  | 1.27 |
| 275 | 554.63 | 1M H <sub>2</sub> SO <sub>4</sub> | 1   | 1691 | 258 | 16.45 | 3.31 |
| 276 | 440.96 | 1M H <sub>2</sub> SO <sub>4</sub> | 5   | 1691 | 258 | 16.45 | 3.31 |
| 277 | 403.28 | 1M H <sub>2</sub> SO <sub>4</sub> | 10  | 1691 | 258 | 16.45 | 3.31 |
| 278 | 362.32 | 1M H <sub>2</sub> SO <sub>4</sub> | 20  | 1691 | 258 | 16.45 | 3.31 |
| 279 | 333.81 | 1M H <sub>2</sub> SO <sub>4</sub> | 30  | 1691 | 258 | 16.45 | 3.31 |
| 280 | 313.43 | 1M H <sub>2</sub> SO <sub>4</sub> | 40  | 1691 | 258 | 16.45 | 3.31 |
| 281 | 296.64 | 1M H <sub>2</sub> SO <sub>4</sub> | 50  | 1691 | 258 | 16.45 | 3.31 |
| 282 | 267.53 | 1M H <sub>2</sub> SO <sub>4</sub> | 75  | 1691 | 258 | 16.45 | 3.31 |



|     |        |                                   |     |      |     |       |      |
|-----|--------|-----------------------------------|-----|------|-----|-------|------|
| 283 | 246.87 | 1M H <sub>2</sub> SO <sub>4</sub> | 100 | 1691 | 258 | 16.45 | 3.31 |
| 284 | 218.17 | 1M H <sub>2</sub> SO <sub>4</sub> | 150 | 1691 | 258 | 16.45 | 3.31 |
| 285 | 198.38 | 1M H <sub>2</sub> SO <sub>4</sub> | 200 | 1691 | 258 | 16.45 | 3.31 |
| 286 | 171.19 | 1M H <sub>2</sub> SO <sub>4</sub> | 300 | 1691 | 258 | 16.45 | 3.31 |
| 287 | 152.27 | 1M H <sub>2</sub> SO <sub>4</sub> | 400 | 1691 | 258 | 16.45 | 3.31 |
| 288 | 137.40 | 1M H <sub>2</sub> SO <sub>4</sub> | 500 | 1691 | 258 | 16.45 | 3.31 |

---

Note: 10-25<sup>[1]</sup>; 26-31<sup>[2]</sup>; 32-43<sup>[3]</sup>; 44-60<sup>[4]</sup>; 61-67<sup>[5]</sup>; 68-75<sup>[6]</sup>; 76-99<sup>[7]</sup>; 100-104<sup>[8]</sup>; 105-113<sup>[9]</sup>; 114-119<sup>[10]</sup>; 120-126<sup>[11]</sup>; 127-138<sup>[12]</sup>; 139-148<sup>[13]</sup>; 149-158<sup>[14]</sup>; 159-164<sup>[15]</sup>; 165-170<sup>[16]</sup>; 180-183<sup>[17]</sup>; 184-188<sup>[18]</sup>; 189-198<sup>[19]</sup>; 199-204<sup>[20]</sup>; 205-288: this work.

## Supplementary Note 1

In this work, an artificial neural network (ANN) model is used to predict the performance of N/O co-doped activated carbon electrodes in supercapacitors. All data used in the ANN model is provided in Supplementary Table 1, collected from the literature<sup>[1-21]</sup>. We also reinforced the ML model with additional experimental data collected in this work. The structural features used in ANN include micropore surface area ( $S_{\text{micro}}$ ) and mesopore surface area ( $S_{\text{meso}}$ ), while the total percentage of nitrogen and oxygen doping is used as the chemical features. In addition, the scan rate is also used to capture the decrease of capacitance at a faster charging/discharging rate. In the training database, the electrochemical performance of N/O co-doped activated carbon electrodes are collected in both 6M KOH and 1M H<sub>2</sub>SO<sub>4</sub> electrolytes. In the ANN model, the type of electrolyte is treated as a dummy variable. The percentages of training, validation, and test data are 70%, 15%, and 15%. The artificial neural network (ANN) includes a layer of 7 neurons as a hidden layer with a hyperbolic tangent sigmoid transfer function. The backpropagation employs Bayesian regularization, making the ANN more robust and generalized without overfitting.<sup>[22]</sup>

## Supplementary Note 2

Following the guideline from IUPAC for the assessment of the surface area, a physisorption isotherm is transformed into the 'BET plot', which derives a value of the BET monolayer capacity ( $Q_m$ ). It is customary to apply the BET equation in the linear form:

$$\frac{p/p^\circ}{Q(1 - p/p^\circ)} = \frac{1}{Q_m C} + \frac{C - 1}{Q_m C} (p/p^\circ)$$

where  $Q$  is the specific amount adsorbed at the relative pressure  $p/p^\circ$  and  $Q_m$  is the specific monolayer capacity. Then, the BET area is calculated by adopting an appropriate value of the molecular cross-sectional area. For applying the BET method to microporous materials, a useful procedure (Rouquerol plots) allows one to avoid subjectivity in evaluating the BET monolayer capacity.<sup>[24]</sup> Here the physisorption isotherm plots in the  $p/p^\circ$  range of 0.05 to 0.35 was transformed into the BET surface area plot. According to Rouquerol plots of C-PhI, five plots where the  $Q(1 - p/p^\circ)$  continuously increases in the  $p/p^\circ$  range of 0.12 to 0.23 was selected for the calculation of BET surface area. The  $C$  value is 50, and the correlation coefficient is 0.99997. Thus, the calculation of BET surface area meets the requirements of IUPAC, and the ultrahigh BET surface area of 4476 m<sup>2</sup>/g validates our design's rationality for synthesizing hyperporous carbons.

### Supplementary Note 3

In Supplementary Figure 17a, the elastic scattering intensity scans summed over  $Q = 0.3\text{--}1.1\text{\AA}^{-1}$  are presented for the dry samples and the wet samples. In the figure, the data have been normalized by the mass of the samples. For the dry carbons, the monotonical behavior of the curves indicates that all the scattering species in these materials are either immobilized or perform motions that are not within the instrumental resolution. Here, the very slight decrease in intensity of the elastic scattering as the temperature increases is solely related to the Debye-Waller factor, and the very similar absolute intensities in both the dry samples indicate that these have very comparable numbers of H-rich species. For the wet samples, the higher scattering intensities as caused by the presence of the electrolyte can be contemplated. In Supplementary Figure 17b, the data from the wet samples are reproduced with the datapoint at  $T = 20\text{ K}$  normalized to unity to allow for the observation of the temperature-dependent changes in the fraction of elastic scattering. In Supplementary Figure 17c, the  $Q$ -dependence of the fractions of the elastic scattering intensities in the QENS signals at 300 K is presented and provides information about the portion of the material that does not perform detectable motions, as depicted by the data points at the highest  $Q$ -values. As expected, based on the above-described synthesis of the materials and the respective final fractions of carbon in each sample, C-Phl-700 presents a lower percent of elastic scattering, 12%, than C-Phl, 20%.

Turning to the QENS spectra collected at 300K, these are presented in Figure 5b at  $Q = 0.7\text{\AA}^{-1}$ . In Figure 5b, the QENS spectra are presented as the imaginary part of the dynamical susceptibilities, obtained via the following expression:

$$\chi''(Q, E) \propto \frac{S(Q, E)}{n_B(T, E)} = S(Q, E) * \left[ \exp\left(\frac{E}{kT}\right) - 1 \right] \quad (\text{S2})$$

where  $n_B(T, E)$  is the temperature Bose factor,  $k$  is the Boltzmann constant,  $T$  is the temperature, and  $S(Q, E)$  is the dynamic scattering function. For the presentation in Supplementary Figure 18a, the signals from the dry samples could also be subtracted from the data from the wet materials to mitigate the influences of elastic scattering at the lowest frequencies. This test has been made and a similar outcome was obtained. With the presentation in Supplementary Figure 18a, visual perception of two distinct components is possible in both samples. That is, relaxations above 10  $\mu\text{eV}$  are detected as well as a component around 1  $\mu\text{eV}$ . In the following lines, the origins of these components will be discussed and in Supplementary Figure 18 b and c, their  $Q$ -dependences can be appreciated.

The component around 1  $\mu\text{eV}$ , which is visually different for C-Phl and C-Phl-700, is associated with the elastic scattering, hence with  $A_0(Q)$ . Indeed, if this component was associated not with elastic signal, but slow dynamics within the materials, as represented by  $\Gamma_N(Q)$  in equation (5), discrepancies in the  $p$ -factor, discussed in the main manuscript (see Figure 5d), between the two samples would be detected. Since this is not the case, the ca. 1  $\mu\text{eV}$  component must be elastic. Still, the presence of two dynamic processes is indicated by the two transitions in the elastic scattering intensity scans, displayed in Supplementary Figure 17, and fitting  $S(Q, E)$  with a single component, either Lorentzian or a stretched function, does not lead to satisfactory results. Therefore, we assume that the relaxation signal above 10  $\mu\text{eV}$  in Supplementary Figure 18a is composed of a slower and a faster component, associated with  $\Gamma_N(Q)$  and  $\Gamma_B(Q)$  in Equation (5). If this supposition is valid, then the slope at the low-frequency side of the main relaxation must differ significantly from unity, indicating that the dynamic process under analysis does not consist

of a single component. As shown in Supplementary Figure 19, this is, indeed, the case (for completeness, the slopes at the high-frequency side are also shown).

### Supplementary Reference

- [1] Wu, H. *et al.* The effect of activation technology on the electrochemical performance of calcium carbide skeleton carbon. *J Solid State Electr* **16**, 2941-2947, (2012).
- [2] Zhang, J., Gong, L., Sun, K., Jiang, J. & Zhang, X. Preparation of activated carbon from waste *Camellia oleifera* shell for supercapacitor application. *J Solid State Electr* **16**, 2179-2186, (2012).
- [3] Chen, X. Y. *et al.* Nitrogen-doped porous carbon for supercapacitor with long-term electrochemical stability. *J. Power Sources* **230**, 50-58, (2013).
- [4] Wang, Y., Yang, R., Wei, Y., Zhao, Z. & Li, M. Preparation of novel pigskin-derived carbon sheets and their low-temperature activation-induced high capacitive performance. *Rsc Adv* **4**, 45318-45324, (2014).
- [5] Li, Y.-T., Pi, Y.-T., Lu, L.-M., Xu, S.-H. & Ren, T.-Z. Hierarchical porous active carbon from fallen leaves by synergy of K<sub>2</sub>CO<sub>3</sub> and their supercapacitor performance. *J Power Sources* **299**, 519-528, (2015).
- [6] Tan, J., Chen, H., Gao, Y. & Li, H. Nitrogen-doped porous carbon derived from citric acid and urea with outstanding supercapacitance performance. *Electrochim Acta* **178**, 144-152, (2015).
- [7] Jiang, L., Sheng, L., Chen, X., Wei, T. & Fan, Z. Construction of nitrogen-doped porous carbon buildings using interconnected ultra-small carbon nanosheets for ultra-high rate supercapacitors. *J Mater Chem A* **4**, 11388-11396, (2016).
- [8] Hao, X. *et al.* Bacterial-cellulose-derived interconnected meso-microporous carbon nanofiber networks as binder-free electrodes for high-performance supercapacitors. *J Power Sources* **352**, 34-41, (2017).
- [9] Yang, W. *et al.* Template-free synthesis of ultrathin porous carbon shell with excellent conductivity for high-rate supercapacitors. *Carbon* **111**, 419-427, (2017).
- [10] Zhang, D. *et al.* Scalable synthesis of hierarchical macropore-rich activated carbon microspheres assembled by carbon nanoparticles for high rate performance supercapacitors. *J Power Sources* **342**, 363-370, (2017).
- [11] Liu, W. *et al.* Nitrogen-Doped Hierarchical Porous Carbon from Wheat Straw for Supercapacitors. *Acs Sustain Chem Eng* **6**, 11595-11605, (2018).
- [12] Song, Z. *et al.* Nitrogen-Enriched Hollow Porous Carbon Nanospheres with Tailored Morphology and Microstructure for All-Solid-State Symmetric Supercapacitors. *Acs Appl Energy Mater* **1**, 4293-4303, (2018).
- [13] Zhu, D. *et al.* A general strategy to synthesize high-level N-doped porous carbons via Schiff-base chemistry for supercapacitors. *J Mater Chem A* **6**, 12334-12343, (2018).
- [14] Song, Z. *et al.* Synergistic design of a N, O co-doped honeycomb carbon electrode and an ionogel electrolyte enabling all-solid-state supercapacitors with an ultrahigh energy density. *J Mater Chem A* **7**, 816-826, (2019).
- [15] Xue, D. *et al.* Template-Free, Self-Doped Approach to Porous Carbon Spheres with High N/O Contents for High-Performance Supercapacitors. *Acs Sustain Chem Eng* **7**, 7024-7034, (2019).
- [16] Ma, C. *et al.* Sustainable recycling of waste polystyrene into hierarchical porous carbon nanosheets with potential applications in supercapacitors. *Nanotechnology* **31**, 035402, (2020).
- [17] Tang, Q. *et al.* Integrating Effect of Surface Modification of Microporous Carbon by Phosphorus/Oxygen as well as the Redox Additive of p - Aminophenol for High - Performance Supercapacitors. *Advanced Materials Interfaces* **7**, (2020).
- [18] Zhou, X. *et al.* Biomass based nitrogen-doped structure-tunable versatile porous carbon materials. *J Mater Chem A* **5**, 12958-12968, (2017).

- [19] Liu, Y. *et al.* N–O–S Co-doped Hierarchical Porous Carbons Derived from Calcium Lignosulfonate for High-Performance Supercapacitors. *Energy & Fuels* **34**, 3909-3922, (2020).
- [20] Mu, J. *et al.* Fishbone-derived N-doped hierarchical porous carbon as an electrode material for supercapacitor. *Journal of Alloys and Compounds* **832**, (2020).
- [21] Chen, X. Y., Chen, C., Zhang, Z. J., Xie, D. H. & Deng, X. Nitrogen-Doped Porous Carbon Prepared from Urea Formaldehyde Resins by Template Carbonization Method for Supercapacitors. *Ind Eng Chem Res* **52**, 10181-10188, (2013).
- [22] Burden, F. & Winkler, D. Bayesian regularization of neural networks. *Methods Mol Biol* **458**, 25-44, (2008).
